# Supplementary material for: Facile synthesis of ultrasmall GdF3 nanowires via an oriented attachment growth and their luminescence properties
Source: Royal Society of Chemistry journal article supplement (doi:10.1039/c0cc04952b), 2011-01-01
Supplement: c0cc04952b.pdf [file c0cc04952b.pdf]

Electronic Supplementary Information

## Facile Synthesis of Ultrasmall GdF<sub>3</sub> Nanowires via Oriented Attachment Growth and Their Luminescence Properties

Yang Tian,\* Jing Tian, Xia Li,\* Binbin Yu, and Tong Shi  
Department of Chemistry, Capital Normal University, Beijing, P. R. China.

### Experimental Section

#### 1. Preparation of GdF<sub>3</sub> ultrathin nanowires and Eu<sup>3+</sup> doping GdF<sub>3</sub> ultrathin nanowires:

Octylamine was purchased from ACROS. Gd(NO<sub>3</sub>)<sub>3</sub>, Octanol and oleic acid were purchased from Tianjin Chemical Reagent Company. All the chemicals were analytical reagents and used without further purification. Gd(acac)<sub>3</sub> was prepared by the method according to the ref.[1] In a typical synthesis of the GdF<sub>3</sub> nanowires, Gd(acac)<sub>3</sub> (1 mmol,) and HF (3 ml) were added in the mixture of octylamine (4.0 ml) and octanol (12.0 ml) with stirring to for about 10 min forming a transparent solution. Then, the solution was transformed in to a Teflon-lined autoclave. The autoclave was sealed and maintained 200 °C for 4 hours in an oven. After cooling to room temperature, white precipitate was collected by centrifugation and washing with ethanol repeatedly to obtain ultrasmall GdF<sub>3</sub> nanowires. The obtained precipitate could be dissolved in non-polar solvent easily such as chloroform and cyclohexane. The GdF<sub>3</sub> ultrasmall nanowires with Eu<sup>3+</sup> doping was prepared by the same method only with 20 mol% Eu(acac)<sub>3</sub> substituting Gd(acac)<sub>3</sub> in precursor solution.

#### 2. Characterization:

The X-ray diffraction (XRD) patterns of the samples were collected using a diffractometer (Rigaku D/Max 2200PC) with CuK $\alpha$  radiation ( $\lambda=1.5418\text{\AA}$ ) and graphite monochromator from 20 to 70° at a scanning rate 2.0 °/min. Unit cell dimensions were determined in the JADE 5 program for X-ray diffraction pattern processing, identification, and quantification. The size and morphology of the products were characterized by transmission electron microscopy (TEM, JEM100-CXII) with the potential of performing selected-area electron diffraction (SAED) equipped with energy dispersive X-ray (EDX, Oxford) spectrum. High-resolution TEM (HR-TEM, JEOL-2010) was applied to study the intrinsic crystallography of the obtained samples. The chemical composition of the as-prepared nanowires and nanodots doped with Eu<sup>3+</sup>

were analyzed by EDX (Oxford). The fluorescence properties of all the samples were investigated under Hitachi F4500 fluorescence spectrometer and Edinburgh lifetime and steady state spectrometer (FLS920) equipped with 450 W Xe lamps. The samples for fluorescence testing were prepared by solid powder of samples.

2. **Fig. S1.** FT-IR spectrum of the as-prepared GdF<sub>3</sub> samples with oleic acid (a) and octylamine (b), respectively.

The FTIR spectrum shows that for the octylamine capping sample (curve b), the broad band around 3429 cm<sup>-1</sup> was assigned to stretching vibrations of N-H bonds and adsorbed water molecular, the absorptions at about 2900 cm<sup>-1</sup> was corresponded to stretching vibrations of C-H bonds, and the bands between 1627 cm<sup>-1</sup> was assigned to bending vibrations of N-H bonds. For the oleic acid capping sample (curve a), the C=O stretching vibration peak at 1739 cm<sup>-1</sup> was clearly observed in the FTIR spectrum. Comparing to that of free oleic acid at 1708 cm<sup>-1</sup>, the C=O peak shifts to higher wavenumber indicates its coordination interaction with the GdF<sub>3</sub> nanocrystals.<sup>1</sup> The multiple peaks in the range of 1000-1700 cm<sup>-1</sup> could be assigned to the C-H, COO- and H<sub>2</sub>O modes or their mixtures.

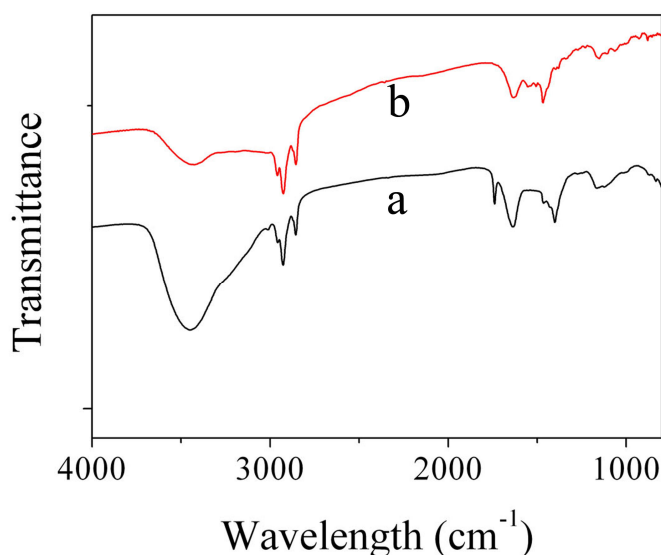

3. **Fig. S2.** TEM image for the  $\text{GdF}_3$  prepared with oleic acid.

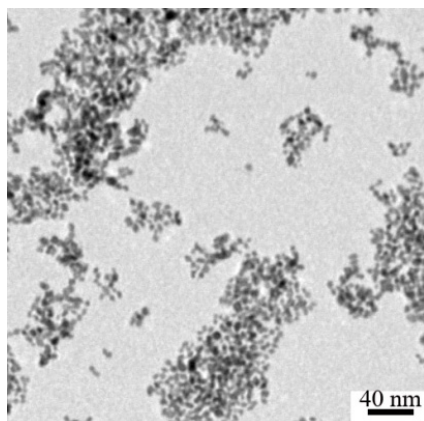

3. **Fig. S3** TEM image of the as-prepared  $\text{GdF}_3$  ultrasmall nanowires (a) and nanodots (b) with 20 mol%  $\text{Eu}^{3+}$  doping

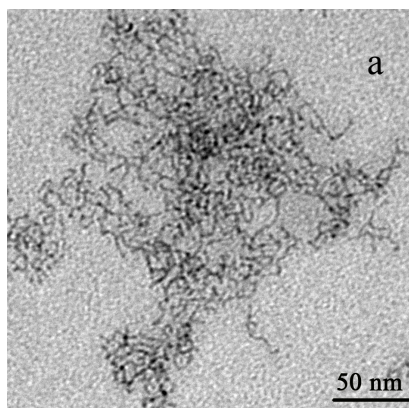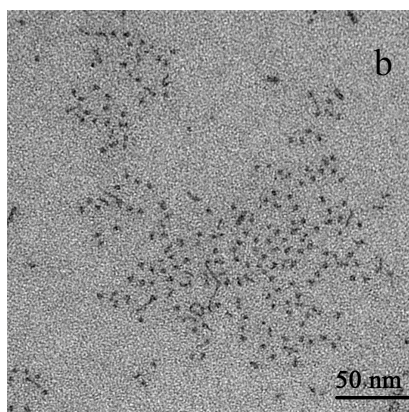

4. **Fig. S4** EDX of the as-prepared GdF<sub>3</sub> ultrasmall nanowires and nanodots with 20 mol% Eu<sup>3+</sup> doping

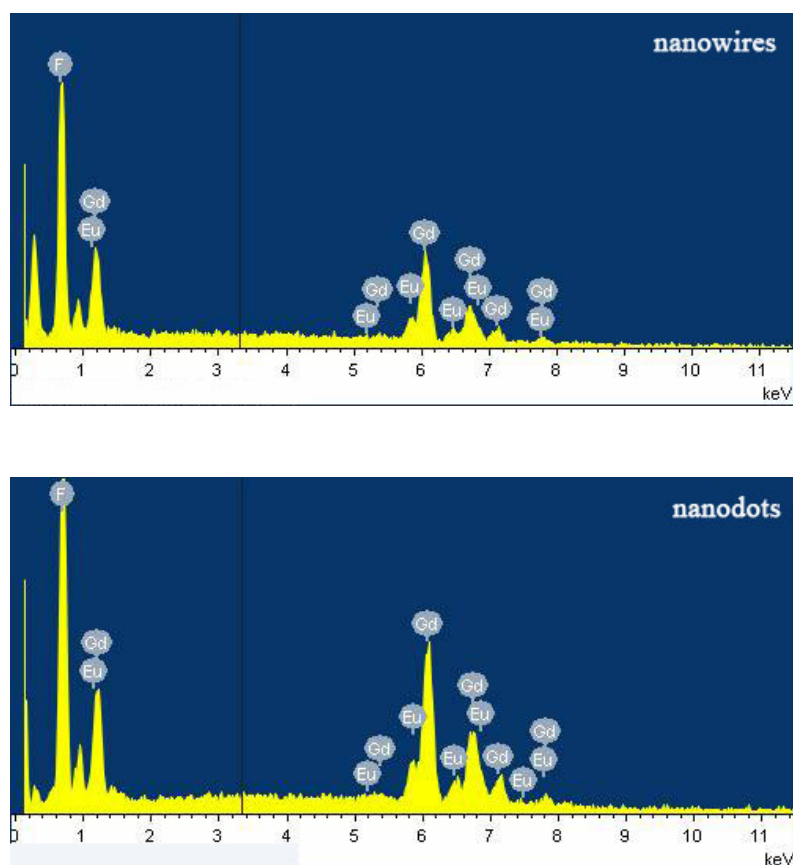

## 5. References

1. X. Xu and X. Wang, *Nano Res.*, 2009, **2**, 891-902
